# Supplementary material for: Limitations of malaria reactive case detection in an area of low and unstable transmission on the Myanmar–Thailand border
Source: Springer Nature journal article supplement (doi:10.1186/s12936-016-1631-9), 2016-11-25

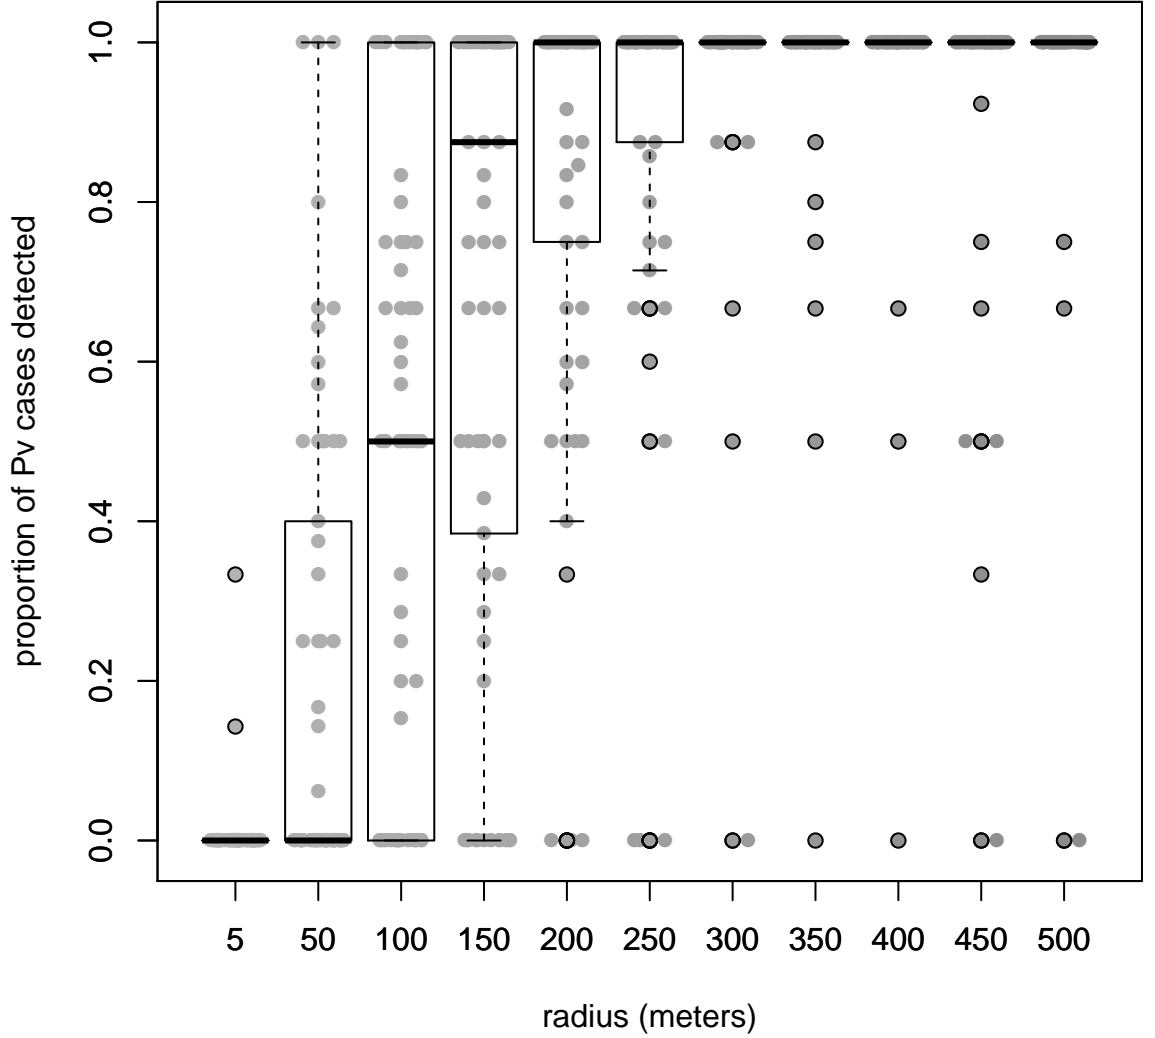

Supplement: MOESM2 [file 11100264]
